# Supplementary material
Source: publisher site journal article supplement (https://www.spandidos-publications.com/402/downloadSupplementary)
Supplement: Supplementary file 1 [file downloadSupplementary]

## Sheet: Sheet1
Table SII. STRING network confidence scores for the interactions in the network of TTN and SPTA1.
node1	node2	neighborhood_on_chromosome	gene_fusion	phylogenetic_cooccurrence	homology	coexpression	experimentally_determined_interaction	database_annotated	automated_textmining	combined_score
TNNI3	TNNC1	0	0	0	0	0.211	0.914	0.9	0.712	0.997
NEB	TTN	0	0	0	0	0.289	0.36	0.9	0.842	0.991
SPTB	SPTA1	0	0	0	0.63	0.058	0.866	0.9	0.836	0.99
TTN	TCAP	0	0	0	0	0.153	0.36	0.9	0.853	0.99
TNNI3	MYL2	0	0	0	0	0.276	0.373	0.9	0.64	0.981
NEB	DES	0	0	0	0	0.1	0.36	0.9	0.698	0.98
SPTB	ANK1	0	0	0	0	0.156	0.425	0.9	0.576	0.976
ACTN2	TNNC1	0	0	0	0	0.258	0.489	0.9	0.395	0.974
ACTN2	TTN	0	0	0	0	0.221	0.36	0.9	0.459	0.969
SPTA1	ANK1	0	0	0	0	0.128	0.444	0.9	0.414	0.967
DES	TTN	0	0	0	0	0.105	0	0.9	0.659	0.966
TTN	TNNC1	0	0	0	0	0.144	0.293	0.9	0.493	0.965
TTN	MYL2	0	0	0	0	0.159	0.292	0.9	0.475	0.964
TTN	TNNI3	0	0	0	0	0.214	0	0.9	0.573	0.963
SPTA1	CALM2	0	0	0	0	0.053	0.952	0	0.25	0.962
ACTN2	TCAP	0	0	0	0	0.277	0	0.9	0.528	0.962
ACTN2	MYL2	0	0	0	0	0.186	0.292	0.9	0.375	0.959
TNNC1	MYL2	0	0	0	0	0.226	0.189	0.9	0.394	0.956
DES	ACTN2	0	0	0	0	0.247	0.065	0.9	0.374	0.95
TCAP	TNNC1	0	0	0	0	0.266	0	0.9	0.373	0.95
DES	TNNI3	0	0	0	0	0.121	0	0.9	0.451	0.947
DES	TCAP	0	0	0	0	0.233	0	0.9	0.342	0.945
TNNI3	TCAP	0	0	0	0	0.184	0	0.9	0.38	0.945
ACTN2	TNNI3	0	0	0	0	0.186	0.1	0.9	0.306	0.942
NEB	TCAP	0	0	0	0	0.073	0	0.9	0.415	0.941
DES	TNNC1	0	0	0	0	0.225	0	0.9	0.31	0.941
NEB	ACTN2	0	0	0	0	0.124	0.051	0.9	0.376	0.941
TCAP	MYL2	0	0	0	0	0.206	0	0.9	0.304	0.939
DES	MYL2	0	0	0	0	0.13	0	0.9	0.307	0.934
NEB	TNNI3	0	0	0	0	0.084	0	0.9	0.15	0.915
NEB	MYL2	0	0	0	0	0.073	0	0.9	0.151	0.914
NEB	TNNC1	0	0	0	0	0.054	0	0.9	0.113	0.908
SPTB	CALM2	0	0	0	0	0.053	0.831	0	0.195	0.859
ACTN2	CALM2	0	0	0	0.798	0.054	0.779	0	0.36	0.796
TTN	CALM2	0	0	0	0	0.055	0.528	0	0.427	0.722
TNNI3	CALM2	0	0	0	0	0.093	0.385	0	0.355	0.609
TTN	ANK1	0	0	0	0	0.054	0.368	0	0.311	0.552
SPTA1	TNNC1	0	0	0	0	0.055	0.489	0	0.119	0.537
DES	CALM2	0	0	0	0	0.042	0	0	0.441	0.441
TTN, titin; SPTA1, spectrin α erythrocytic 1.
